# Supplementary material for: In Silico Modeling and Structural Analysis of Soluble Epoxide Hydrolase Inhibitors for Enhanced Therapeutic Design
Source: MDPI journal article supplement (doi:10.3390/molecules28176379), 2023-08-31
Supplement: s1 [file s1]

**Table S2.** Hyperparameters which were optimized in the development of non-linear models

| Machine learning Method      | Parameters optimized                                                                                                                                                                                                                                                      |
|------------------------------|---------------------------------------------------------------------------------------------------------------------------------------------------------------------------------------------------------------------------------------------------------------------------|
| Multilayer perception (MLP)  | hidden_layer_sizes=(5,), (10,), (50,), (100), (5,5,), (10,5,), (5,5,5,), (10,5,5,), (25,25,), (50,50,), etc.<br>activation: identity, logistic, tanh,relu<br>learning_rate: constant, adaptive, invscaling<br>solver: sgd, adam, lbfgs<br>alpha: 0.0001, 0.001, 0.01, 0.1 |
| Random forest (RF)           | criterion: mse, mae<br>max_features: auto, sqrt,log2<br>max_depth: 10,30,50,70,90,100,200<br>n_estimators: 5,10,20,50,100,200<br>min_samples_leaf: 1,2,4<br>min_samples_split: 2,5,10                                                                                     |
| Support vector machine (SVM) | C: 0.1,1,10,100,1000<br>gamma: 1,0.1,0.01<br>kernel: rbf, linear                                                                                                                                                                                                          |

**Table S3.** Summary of the linear 2D-QSAR models generated with different descriptor-calculating tools and feature selection techniques.

| SN | Descriptor | Method  | Score          | CV | Q <sup>2</sup> <sub>LOO</sub> | R <sup>2</sup> <sub>Pred</sub> | Average |
|----|------------|---------|----------------|----|-------------------------------|--------------------------------|---------|
| 01 | AlvaDes    | SFS-MLR | R <sup>2</sup> | 0  | 0.788                         | 0.767                          | 0.778   |
| 02 | AlvaDes    | SFS-MLR | R <sup>2</sup> | 5  | 0.752                         | 0.595                          | 0.673   |
| 03 | AlvaDes    | SFS-MLR | NMAE           | 0  | 0.775                         | 0.647                          | 0.711   |
| 04 | AlvaDes    | SFS-MLR | NMAE           | 5  | 0.776                         | 0.577                          | 0.677   |
| 05 | AlvaDes    | SFS-MLR | NMPD           | 0  | 0.790                         | 0.705                          | 0.747   |
| 06 | AlvaDes    | SFS-MLR | NMPD           | 5  | 0.736                         | 0.720                          | 0.728   |
| 07 | AlvaDes    | SFS-MLR | NMG<br>D       | 0  | 0.790                         | 0.705                          | 0.747   |
| 08 | AlvaDes    | SFS-MLR | NMG<br>D       | 5  | 0.746                         | 0.738                          | 0.742   |
| 09 | AlvaDes    | GA-MLR  | NA             | NA | 0.784                         | 0.792                          | 0.788   |
| 10 | CDK        | SFS-MLR | R <sup>2</sup> | 0  | 0.624                         | 0.626                          | 0.625   |
| 11 | CDK        | SFS-MLR | R <sup>2</sup> | 5  | 0.674                         | 0.648                          | 0.661   |
| 12 | CDK        | SFS-MLR | NMAE           | 0  | 0.666                         | 0.617                          | 0.641   |
| 13 | CDK        | SFS-MLR | NMAE           | 5  | 0.683                         | 0.567                          | 0.625   |

|    |              |         |                |    |       |       |       |
|----|--------------|---------|----------------|----|-------|-------|-------|
| 14 | CDK          | SFS-MLR | NMPD           | 0  | 0.611 | 0.634 | 0.623 |
| 15 | CDK          | SFS-MLR | NMPD           | 5  | 0.625 | 0.627 | 0.626 |
| 16 | CDK          | SFS-MLR | NMG<br>D       | 0  | 0.611 | 0.634 | 0.623 |
| 17 | CDK          | SFS-MLR | NMG<br>D       | 5  | 0.625 | 0.627 | 0.626 |
| 18 | CDK          | GA-MLR  | NA             | NA | 0.690 | 0.662 | 0.676 |
| 19 | GSFRAG+ISIDA | SFS-MLR | R <sup>2</sup> | 0  | 0.741 | 0.651 | 0.696 |
| 20 | GSFRAG+ISIDA | SFS-MLR | R <sup>2</sup> | 5  | 0.746 | 0.610 | 0.678 |
| 21 | GSFRAG+ISIDA | SFS-MLR | NMAE           | 0  | 0.723 | 0.600 | 0.661 |
| 22 | GSFRAG+ISIDA | SFS-MLR | NMAE           | 5  | 0.716 | 0.587 | 0.652 |
| 23 | GSFRAG+ISIDA | SFS-MLR | NMPD           | 0  | 0.732 | 0.657 | 0.695 |
| 24 | GSFRAG+ISIDA | SFS-MLR | NMPD           | 5  | 0.743 | 0.632 | 0.688 |
| 25 | GSFRAG+ISIDA | SFS-MLR | NMG<br>D       | 0  | 0.732 | 0.657 | 0.695 |
| 26 | GSFRAG+ISIDA | SFS-MLR | NMG<br>D       | 5  | 0.714 | 0.528 | 0.621 |
| 27 | GSFRAG+ISIDA | GA-MLR  | NA             | NA | 0.723 | 0.677 | 0.700 |
| 28 | Mordred      | SFS-MLR | R <sup>2</sup> | 0  | 0.765 | 0.674 | 0.720 |
| 29 | Mordred      | SFS-MLR | R <sup>2</sup> | 5  | 0.746 | 0.581 | 0.663 |
| 30 | Mordred      | SFS-MLR | NMAE           | 0  | 0.734 | 0.583 | 0.658 |
| 31 | Mordred      | SFS-MLR | NMAE           | 5  | 0.705 | 0.598 | 0.652 |
| 32 | Mordred      | SFS-MLR | NMPD           | 0  | 0.751 | 0.600 | 0.675 |
| 33 | Mordred      | SFS-MLR | NMPD           | 5  | 0.743 | 0.603 | 0.673 |
| 34 | Mordred      | SFS-MLR | NMG<br>D       | 0  | 0.761 | 0.630 | 0.695 |
| 35 | Mordred      | SFS-MLR | NMG<br>D       | 5  | 0.747 | 0.637 | 0.692 |
| 36 | Mordred      | GA-MLR  | NA             | NA | 0.746 | 0.730 | 0.738 |
| 37 | MNA          | SFS-MLR | R <sup>2</sup> | 0  | 0.773 | 0.560 | 0.667 |
| 38 | MNA          | SFS-MLR | R <sup>2</sup> | 5  | 0.759 | 0.600 | 0.679 |
| 39 | MNA          | SFS-MLR | NMAE           | 0  | 0.749 | 0.579 | 0.664 |
| 40 | MNA          | SFS-MLR | NMAE           | 5  | 0.744 | 0.642 | 0.693 |
| 41 | MNA          | SFS-MLR | NMPD           | 0  | 0.750 | 0.522 | 0.636 |
| 42 | MNA          | SFS-MLR | NMPD           | 5  | 0.762 | 0.521 | 0.642 |
| 43 | MNA          | SFS-MLR | NMG<br>D       | 0  | 0.750 | 0.522 | 0.636 |
| 44 | MNA          | SFS-MLR | NMG<br>D       | 5  | 0.760 | 0.529 | 0.645 |
| 45 | MNA          | GA-MLR  | NA             | NA | 0.767 | 0.625 | 0.696 |
| 46 | SIRMS        | SFS-MLR | R <sup>2</sup> | 0  | 0.741 | 0.530 | 0.636 |
| 47 | SIRMS        | SFS-MLR | R <sup>2</sup> | 5  | 0.741 | 0.530 | 0.636 |
| 48 | SIRMS        | SFS-MLR | NMAE           | 0  | 0.734 | 0.127 | 0.430 |
| 49 | SIRMS        | SFS-MLR | NMAE           | 5  | 0.734 | 0.127 | 0.430 |
| 50 | SIRMS        | SFS-MLR | NMPD           | 0  | 0.738 | 0.372 | 0.555 |
| 51 | SIRMS        | SFS-MLR | NMPD           | 5  | 0.738 | 0.372 | 0.555 |

|    |               |         |                |    |       |       |       |
|----|---------------|---------|----------------|----|-------|-------|-------|
| 52 | SIRMS         | SFS-MLR | NMG<br>D       | 0  | 0.728 | 0.403 | 0.566 |
| 53 | SIRMS         | SFS-MLR | NMG<br>D       | 5  | 0.728 | 0.403 | 0.566 |
| 54 | SIRMS         | GA-MLR  | NA             | NA | 0.717 | 0.622 | 0.670 |
| 55 | MERA+MERSY    | SFS-MLR | R <sup>2</sup> | 0  | 0.708 | 0.658 | 0.683 |
| 56 | MERA+MERSY    | SFS-MLR | R <sup>2</sup> | 5  | 0.724 | 0.708 | 0.716 |
| 57 | MERA+MERSY    | SFS-MLR | NMAE           | 0  | 0.668 | 0.603 | 0.636 |
| 58 | MERA+MERSY    | SFS-MLR | NMAE           | 5  | 0.664 | 0.616 | 0.640 |
| 59 | MERA+MERSY    | SFS-MLR | NMPD           | 0  | 0.648 | 0.646 | 0.647 |
| 60 | MERA+MERSY    | SFS-MLR | NMPD           | 5  | 0.696 | 0.666 | 0.681 |
| 61 | MERA+MERSY    | SFS-MLR | NMG<br>D       | 0  | 0.709 | 0.636 | 0.672 |
| 62 | MERA+MERSY    | SFS-MLR | NMG<br>D       | 5  | 0.699 | 0.596 | 0.647 |
| 63 | MERA+MERSY    | GA-MLR  | NA             | NA | 0.683 | 0.716 | 0.699 |
| 64 | RDKit         | SFS-MLR | R <sup>2</sup> | 0  | 0.816 | 0.551 | 0.683 |
| 65 | RDKit         | SFS-MLR | R <sup>2</sup> | 5  | 0.824 | 0.504 | 0.664 |
| 66 | RDKit         | SFS-MLR | NMAE           | 0  | 0.811 | 0.550 | 0.681 |
| 67 | RDKit         | SFS-MLR | NMAE           | 5  | 0.816 | 0.458 | 0.637 |
| 68 | RDKit         | SFS-MLR | NMPD           | 0  | 0.816 | 0.551 | 0.683 |
| 69 | RDKit         | SFS-MLR | NMPD           | 5  | 0.804 | 0.559 | 0.681 |
| 70 | RDKit         | SFS-MLR | NMG<br>D       | 0  | 0.792 | 0.570 | 0.681 |
| 71 | RDKit         | SFS-MLR | NMG<br>D       | 5  | 0.804 | 0.559 | 0.681 |
| 72 | RDKit         | GA-MLR  | NA             | NA | 0.758 | 0.670 | 0.714 |
| 73 | PyDescriptors | SFS-MLR | R <sup>2</sup> | 0  | 0.780 | 0.519 | 0.650 |
| 74 | PyDescriptors | SFS-MLR | R <sup>2</sup> | 5  | 0.763 | 0.418 | 0.591 |
| 75 | PyDescriptors | SFS-MLR | NMAE           | 0  | 0.782 | 0.526 | 0.654 |
| 76 | PyDescriptors | SFS-MLR | NMAE           | 5  | 0.762 | 0.496 | 0.629 |
| 77 | PyDescriptors | SFS-MLR | NMPD           | 0  | 0.708 | 0.638 | 0.673 |
| 78 | PyDescriptors | SFS-MLR | NMPD           | 5  | 0.66  | 0.589 | 0.625 |
| 79 | PyDescriptors | SFS-MLR | NMG<br>D       | 0  | 0.782 | 0.526 | 0.654 |
| 80 | PyDescriptors | SFS-MLR | NMG<br>D       | 5  | 0.666 | 0.586 | 0.626 |
| 81 | PyDescriptors | GA-MLR  | NA             | NA | 0.808 | 0.66  | 0.734 |

---

**Table S4.** Correlation matrix for the 2D-QSAR model.

| Descriptors  | ATS6m | F09[N-O] | CATS2D_05_AA | SM14_AEA(dm) | CATS2D_03_NL | RDF140v | CATS2D_07_AA | J_Dz(p) |
|--------------|-------|----------|--------------|--------------|--------------|---------|--------------|---------|
| ATS6m        | 1.00  | -0.14    | -0.03        | 0.74         | -0.31        | 0.49    | 0.20         | -0.62   |
| F09[N-O]     |       | 1.00     | -0.20        | -0.05        | 0.16         | -0.13   | -0.19        | 0.11    |
| CATS2D_05_AA |       |          | 1.00         | -0.29        | -0.10        | -0.28   | 0.03         | 0.33    |
| SM14_AEA(dm) |       |          |              | 1.00         | -0.19        | 0.54    | 0.20         | -0.75   |
| CATS2D_03_NL |       |          |              |              | 1.00         | -0.28   | -0.03        | 0.22    |
| RDF140v      |       |          |              |              |              | 1.00    | -0.04        | -0.58   |
| CATS2D_07_AA |       |          |              |              |              |         | 1.00         | -0.21   |
| J_Dz(p)      |       |          |              |              |              |         |              | 1.00    |

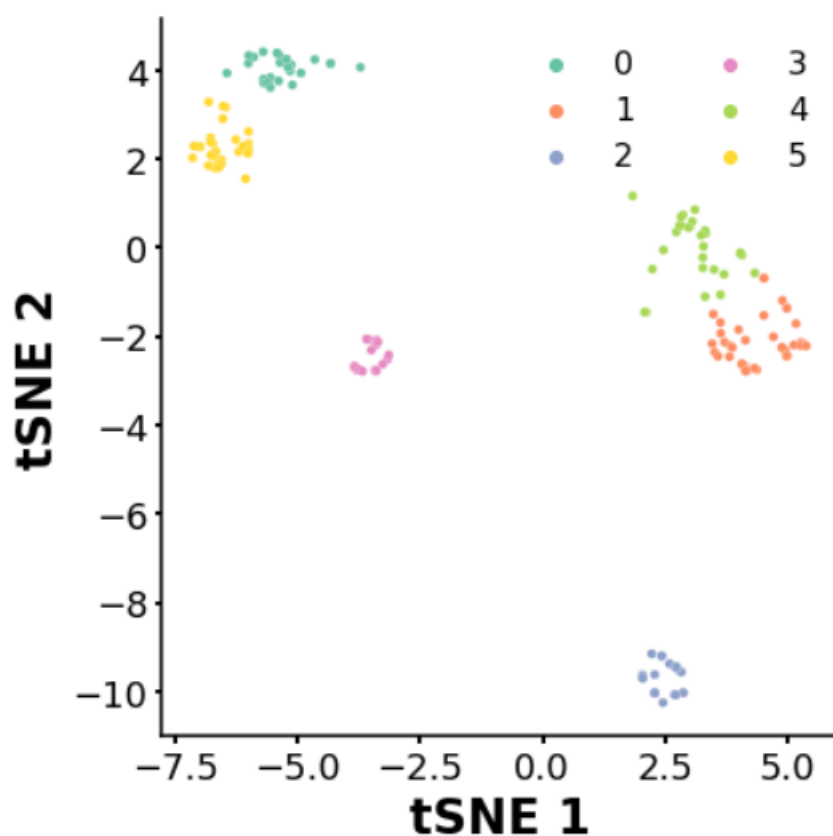

**Figure S1.** The cluster analyses on the t-SNE plot to depict the chemical space of the dataset compounds.

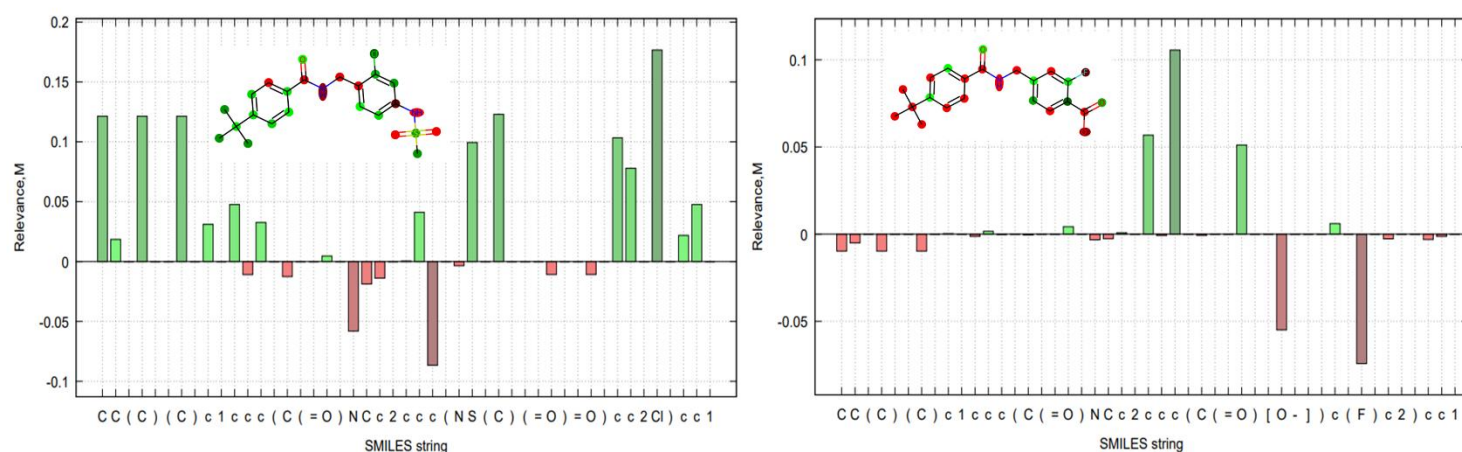

**Figure S2.** The relevance of each atom of D1\_01 (left) and D2\_37 (right) as per Layer-wise Relevance Propagation (LRP) algorithm as implemented in Transformer-CNN.

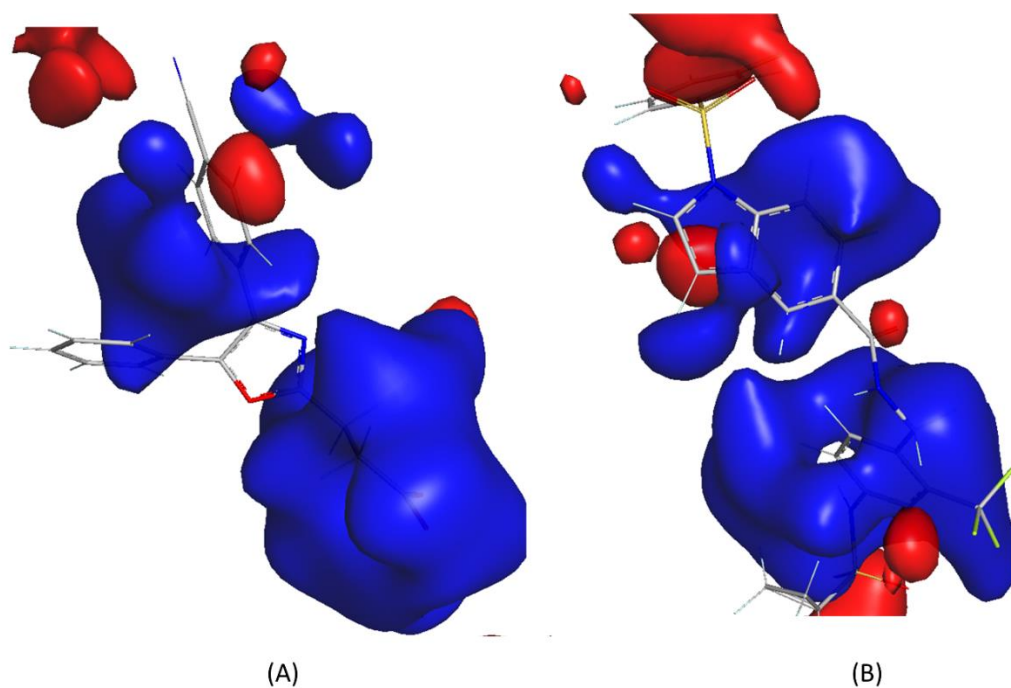

**Figure S3.** Electrostatic maps of (A) D5\_32 and (B) D4\_02.

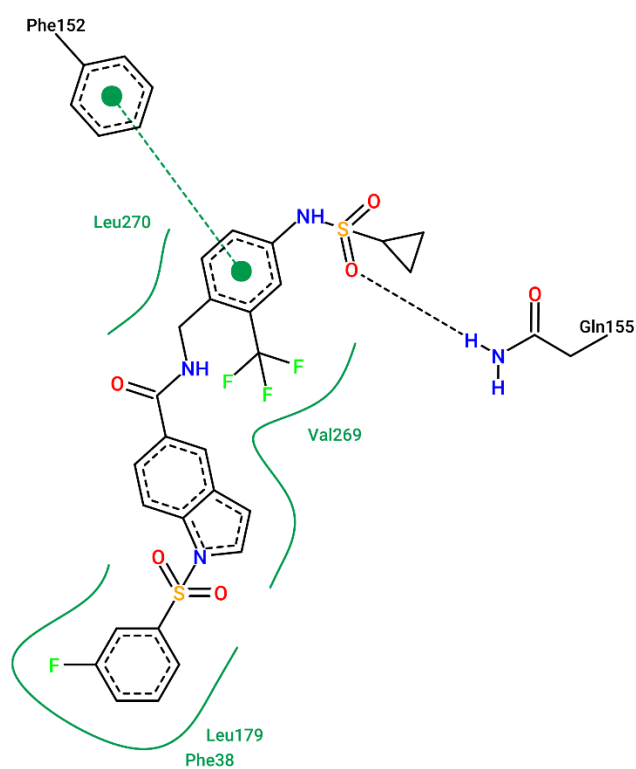

**Figure S4.** PoseView (<https://proteins.plus/>) 2D diagram of the pose obtained from the final trajectory of the MD simulations for D4\_02.
